# Supplementary material
Source: PubMed Central journal article supplement (PMC5579470)
Supplement: EMBR-18-1646-s001.pdf [file EMBR-18-1646-s001.pdf]

## **Appendix Figures/Tables**

### **The Appendix figure/table legends:**

**Appendix Table S1** Detailed information of seven candidate circRNAs (including loci, strand, genomic and spliced length). *Page 2.*

**Appendix Figure S1** Candidate circRNAs were amplified by divergent primers and tested by RT-PCR in T24T and UMUC3 cells. *Page 2.*

**Appendix Figure S2** Six binding sites mutation of circHIPK3. *Page 3.*

**Appendix Table S2** Primers and RNA sequences used in this study. *Page 4-7.*

**Appendix Table S1**

| Name                            | Circ_loci                | Strand | Genomic length | Spliced length |
|---------------------------------|--------------------------|--------|----------------|----------------|
| hsa_circ_0001524                | Chr5:131677703-131709272 | (+)    | 31570          | 813            |
| hsa_circ_0076704                | Chr:6:47503280-47554766  | (-)    | 51487          | 537            |
| circHIPK3<br>(hsa_circ_0000284) | Chr:11:33286413-33287511 | (-)    | 1099           | 1099           |
| hsa_circ_0001736                | Chr7:105073619-105077433 | (+)    | 3815           | 633            |
| hsa_circ_0003423                | Chr18:58934433-58953799  | (+)    | 19367          | 804            |
| hsa_circ_0070467                | Chr4:9457335-94586444    | (-)    | 13094          | 672            |
| hsa_circ_0072309                | Chr5:38523419-38530666   | (+)    | 7248           | 580            |

**Appendix Figure S1**

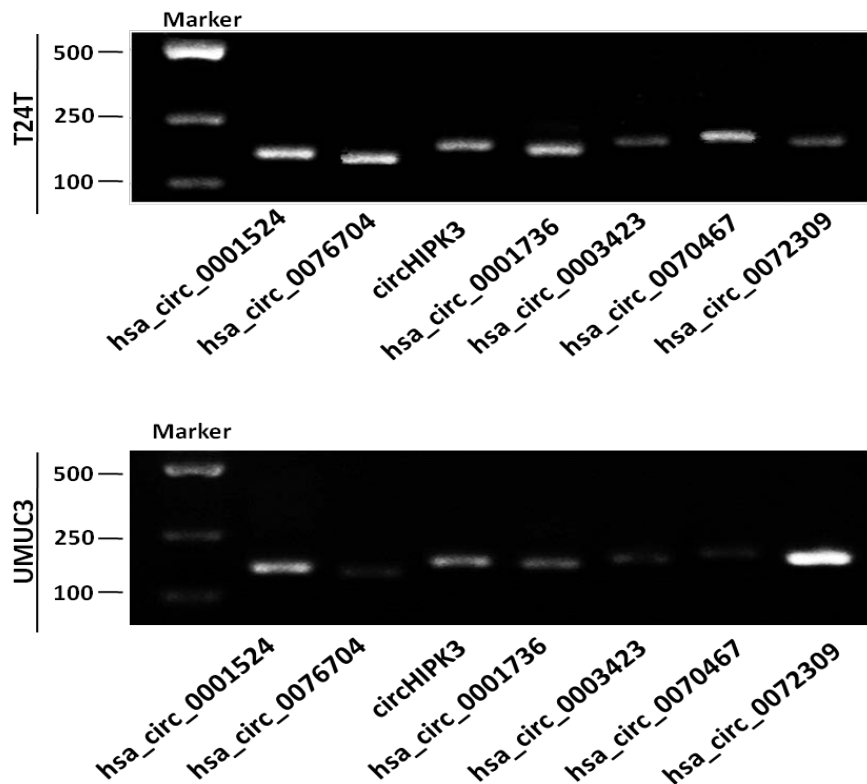

## Appendix Figure S2

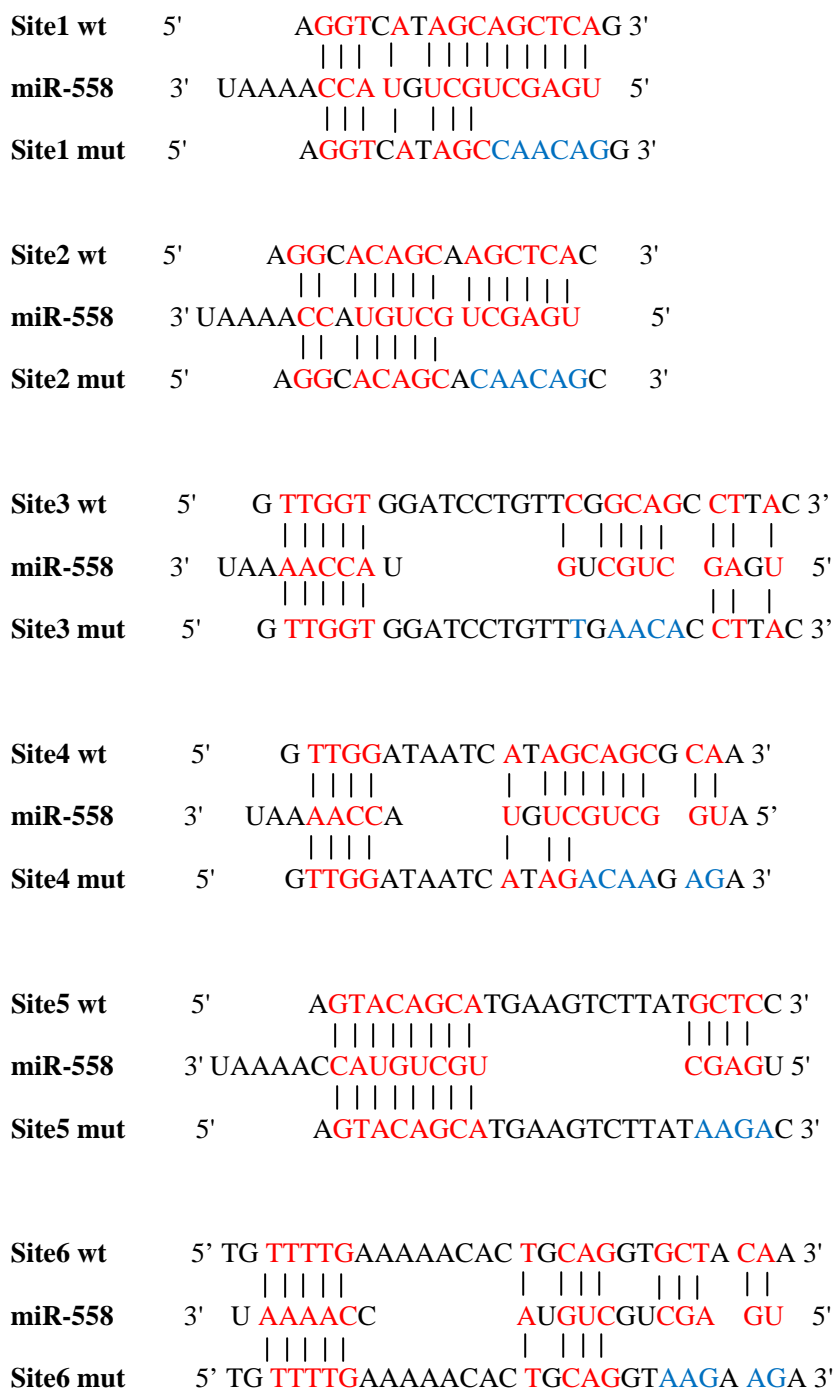

**Appendix Table S2**

| <b>Primers for PCR</b>      |                         |
|-----------------------------|-------------------------|
| hsa_circ_0001524<br>Forward | ATCATCTTGCCTGGGTTCC     |
| hsa_circ_0001524<br>Reverse | TCCATTGGGTGCTGTGAA      |
| hsa_circ_0076704<br>Forward | CATGAAGCCCAGGACGATT     |
| hsa_circ_0076704<br>Reverse | AGTTCTCCTTCCAGCCACC     |
| hsa_circ_0001736<br>Forward | GCAAATGGGTATTTCTTTA     |
| hsa_circ_0001736<br>Reverse | AGTAATTGATGTTGGAGTAT    |
| hsa_circ_0003423<br>Forward | GGGTGGACGTGTTGGGAGT     |
| hsa_circ_0003423<br>Reverse | TCAGGGCAGGTGTAGGGAG     |
| hsa_circ_0070467<br>Forward | CACTGGGACTGAACATTTGA    |
| hsa_circ_0070467<br>Reverse | CACTGGGACTGAACATTTGA    |
| hsa_circ_0072309<br>Forward | TGTCTGCTGATTTCTCAACCTC  |
| hsa_circ_0072309<br>Reverse | CGTAAATATCCATCATCTGTGC  |
| circHIPK3 Forward           | TTCAACATATCTACAATCTCGGT |
| circHIPK3 Reverse           | ACCATTCACATAGGTCCGT     |
| linear-HIPK3 Forward        | TCACAAGTCTTGGTCTACCCA   |
| linear-HIPK3 Reverse        | CACATAGGTCCGTGGATAGTTTC |
| GAPDH Forward               | CAATGACCCCTTCATTGACC    |
| GAPDH Reverse               | TTGATTTTGGAGGGATCTCG    |
| divergent-GAPDH<br>Forward  | GAAGGTGAAGGTCGAGTC      |
| divergent-GAPDH<br>Reverse  | GAAGATGGTGATGGGATTTC    |
| HPSE Forward                | GAATGGACGGACTGCTAC      |
| HPSE Reverse                | CCAAAGAATACTTGCCTCA     |
| VEGF Forward                | ATGACGAGGGCCTGGAGTGT    |
| VEGF Reverse                | CATTTACACGTCTGCGGATCT   |

|                         |                       |
|-------------------------|-----------------------|
| MMP9 Forward            | GCAGAGGAATACCTGTACCGC |
| MMP9 Reverse            | AGGTTTGGAATCTGCCCAGGT |
| hsa-miR-1283 Forward    | Ribobio               |
| hsa-miR-1283 Reverse    | Ribobio               |
| hsa-miR-551b-5p Forward | Ribobio               |
| hsa-miR-551b-5p Reverse | Ribobio               |
| hsa-miR-1178-3p Forward | Ribobio               |
| hsa-miR-1178-3p Reverse | Ribobio               |
| hsa-miR-193b-3p Forward | Ribobio               |
| hsa-miR-193b-3p Reverse | Ribobio               |
| hsa-miR-653-5p Forward  | Ribobio               |
| hsa-miR-653-5p Reverse  | Ribobio               |
| hsa-miR-193a-3p Forward | Ribobio               |
| hsa-miR-193a-3p Reverse | Ribobio               |
| hsa-miR-148b-3p Forward | Ribobio               |
| hsa-miR-148b-3p Reverse | Ribobio               |
| hsa-miR-558 Forward     | Ribobio               |
| hsa-miR-558 Reverse     | Ribobio               |
| hsa-miR-1179 Forward    | Ribobio               |
| hsa-miR-1179 Reverse    | Ribobio               |
| hsa-miR-495-3p Forward  | Ribobio               |
| hsa-miR-495-3p Reverse  | Ribobio               |
| hsa-miR-197-5p Forward  | Ribobio               |
| hsa-miR-197-5p Reverse  | Ribobio               |
| hsa-miR-33a-5p Forward  | Ribobio               |
| hsa-miR-33a-5p Reverse  | Ribobio               |
| U6 Forward              | Ribobio               |

|                                      |                                                 |
|--------------------------------------|-------------------------------------------------|
| U6 Reverse                           | Ribobio                                         |
| <b>siRNAs</b>                        |                                                 |
| si NC sense                          | UUCUCCGAACGUGUCACGUTT                           |
| si NC antisense                      | ACGUGACACGUUCGGAGAATT                           |
| si circHIPK3-1 sense                 | GGUACUACAGGUAUGGCCUTT                           |
| si circHIPK3-1 antisense             | AGGCCAUACCUGUAGUACCGA                           |
| si circHIPK3-2 sense                 | UACUACAGGUAUGGCCUCATT                           |
| si circHIPK3-2 antisense             | UGAGGCCAUACCUGUAGUACC                           |
| si circHIPK3-3 sense                 | UCGGUACUACAGGUAUGGCTT                           |
| si circHIPK3-3 antisense             | GCCAUACCUGUAGUACCGAGA                           |
| <b>FISH probes</b>                   |                                                 |
| circHIPK3                            | Ribobio                                         |
| U6                                   | Ribobio                                         |
| 18S                                  | Ribobio                                         |
| miR-558                              | Ribobio                                         |
| <b>Biotinylated probes</b>           |                                                 |
| circHIPK3                            | CCATACCTGTAGTACCGAGA                            |
| (biotin)miR-558 mimics sense         | UGAGCUGCUGUACCAAAAU                             |
| (biotin)miR-558 mimics antisense     | UUUGGUACAGCAGCUCAUU                             |
| biotin-miR-558 mutant sense          | UACAUAUCUGUACCAAAAU                             |
| biotin-miR-558 mutant antisense      | UUUGGUACAGAU AUGUAUU                            |
| <b>Northern blot probes</b>          |                                                 |
| circHIPK3 Forward                    | GTATGGCCTCACAAGTCTTG                            |
| circHIPK3-T7-Reverse                 | TAATACGACTCACTATAGGGCTGTAGTACCGAGAT<br>TGTAGAT  |
| HIPK3 Forward                        | TCACAAGTCTTGGTCTACCCA                           |
| HIPK3-T7-Reverse                     | TAATACGACTCACTATAGGGCACATAGGTCCGTGG<br>ATAGTTTC |
| <b>miR-558 mimics and inhibitors</b> |                                                 |
| mimics NC sense                      | UUCUCCGAACGUGUCACGUTT                           |

|                          |                       |
|--------------------------|-----------------------|
| mimics NC antisense      | ACGUGACACGUUCGGAGAATT |
| miR-558 mimics sense     | UGAGCUGCUGUACCAAAAU   |
| miR-558 mimics antisense | UUUGGUACAGCAGCUCAUU   |
| anti NC                  | CAGUACUUUUGUGUAGUACAA |
| anti miR-558             | AUUUUGGUACAGCAGCUCA   |
