# Supplementary material
Source: PubMed Central journal article supplement (PMC5579470)
Supplement: EMBR-18-1646-s002.pdf [file EMBR-18-1646-s002.pdf]

## Expanded View Figures

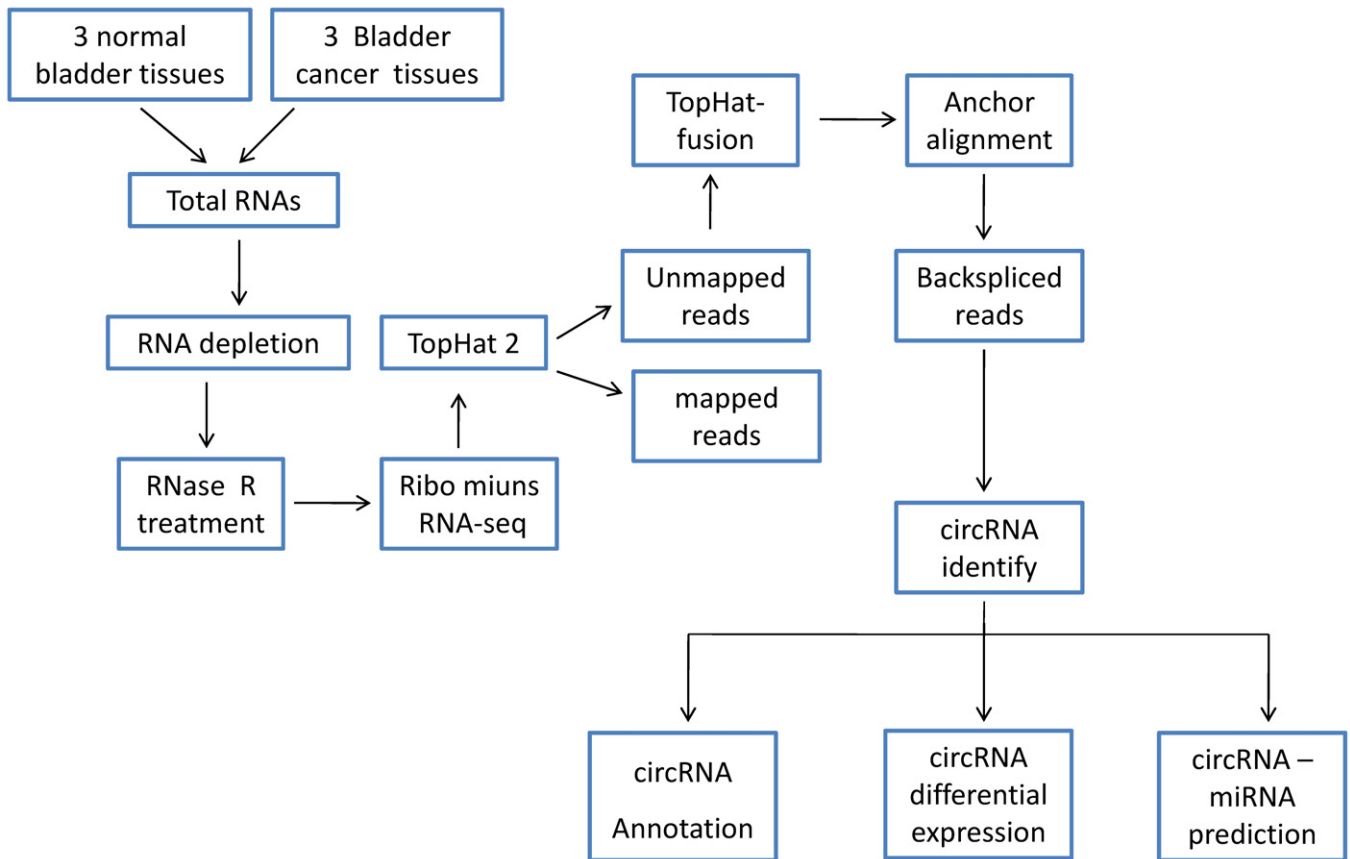

**Figure EV1. RNA-seq pipeline.**

The RNA-seq pipeline for identifying circRNAs in three pairs of bladder cancer tissues and paired adjacent normal bladder tissues is shown.

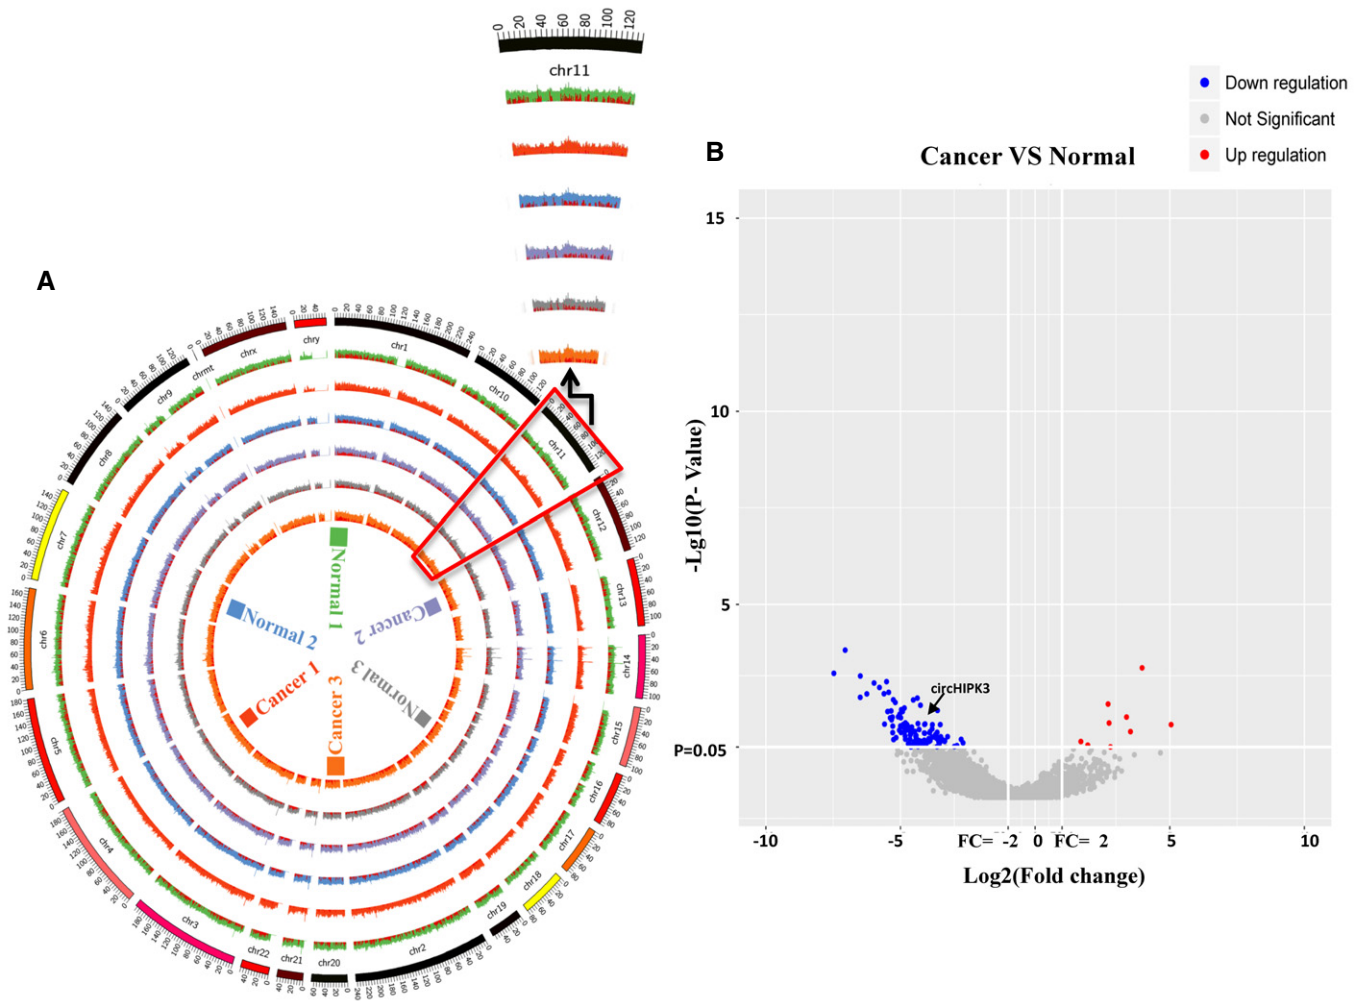

**Figure EV2. Mapping results of linear and circular RNA reads on human chromosomes and differentially expressed circRNAs.**

A The outside circle represents the genomic DNA, and the red color represents circRNAs reads junction of each sample. Different color represents different sample. The zoomed-in part is chromosome 11, and the locus of circHIPK3 is chr11:33286413|33287511 (–). The scale of the axis is  $10^6$  bp.

B Volcano plots were constructed for visualizing differentially expressed circRNAs between bladder cancer and normal bladder samples. Differentially expressed circRNAs were filtered by  $|\text{FC} (\text{fold change})| \geq 2$  ( $\text{Log}_2$  scaled) and  $P < 0.05$  ( $-\text{Log}_{10}$  scaled). The red points represent significantly up-regulated circRNAs, and blue points represent significantly down-regulated circRNAs.

**Target: circHIPK3 Length: 1099**

**miRNA : hsa-miR-558 Length: 19**

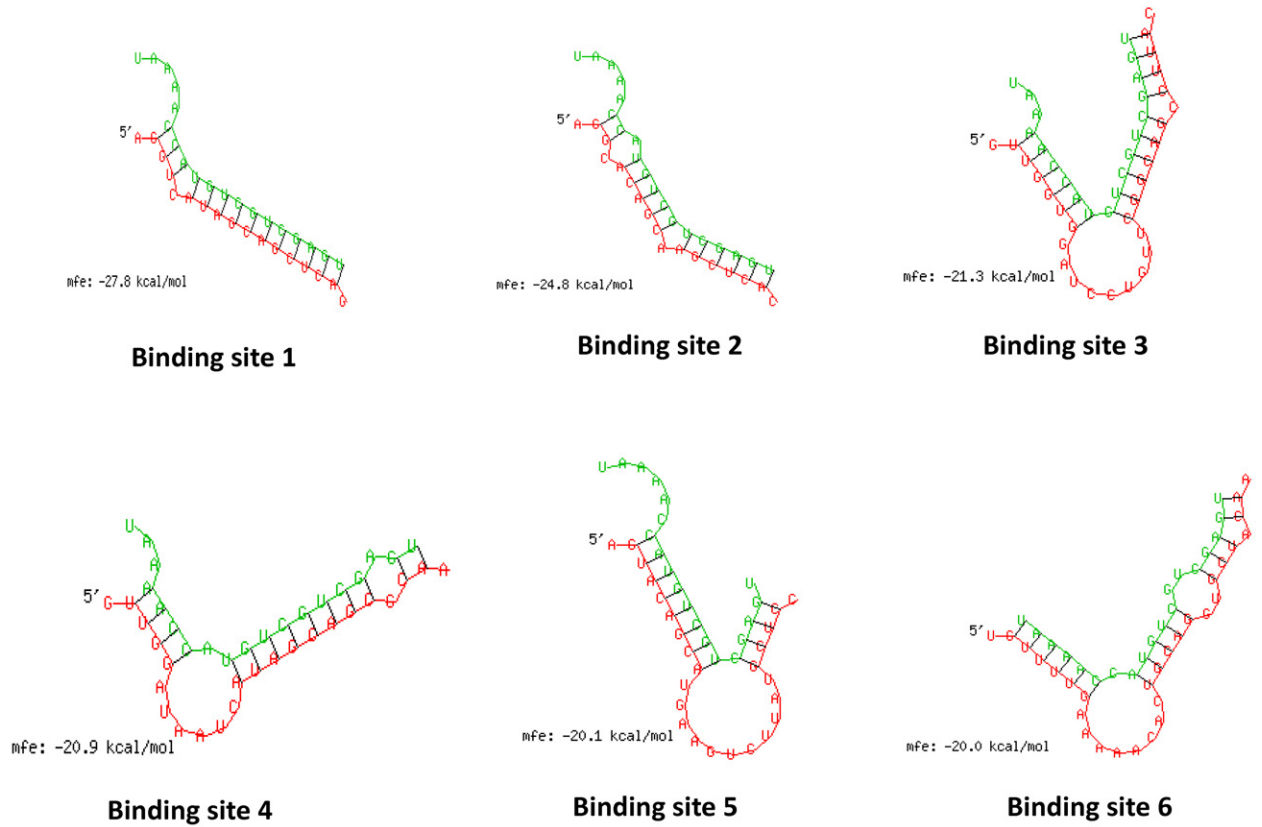

**Figure EV3. Binding sites of miR-558 on circHIPK3.**

Detailed information of six binding sites of miR-558 on circHIPK3 that were analyzed by the bioinformatics program RNAhybrid.

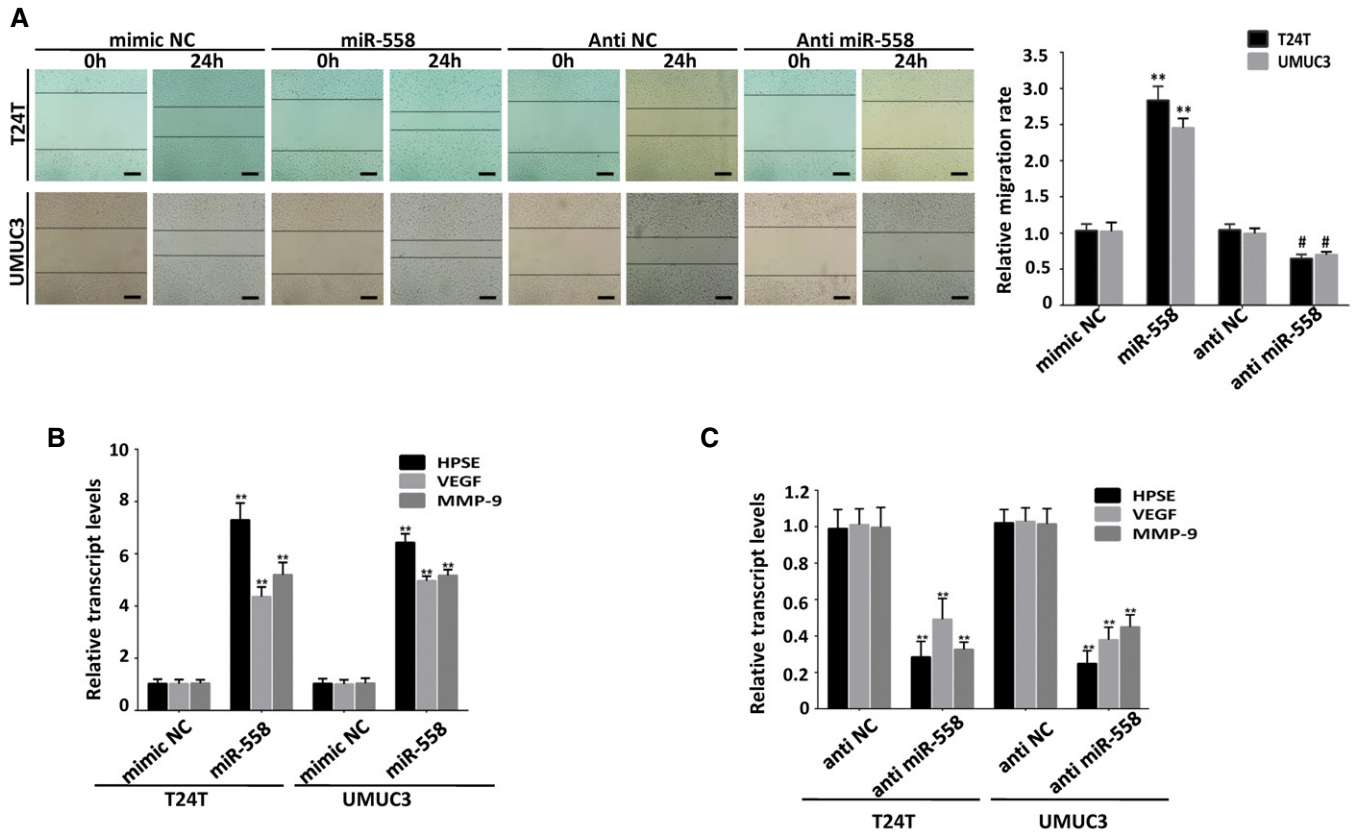

**Figure EV4.** miR-558 promotes cell migration, invasion, and angiogenesis via up-regulating the expression of HPSE *in vitro*.

- A** Wound healing assay indicating that transfection of miR-558 mimics promoted cell migration, while transfection with anti-miR-558 inhibited cell migration. Data are mean  $\pm$  SEM,  $n = 3$ . \*\* $P < 0.01$  versus mimic NC; # $P < 0.05$  versus anti-NC (Student's *t*-test). Scale bar, 200  $\mu$ m.
- B, C** Real-time PCR assay indicating that transfection of miR-558 mimics up-regulated the expression of HPSE and its downstream targets MMP-9 and VEGF in bladder cancer cells, and anti-miR-558 down-regulated the expression of HPSE, MMP-9, and VEGF. Data are mean  $\pm$  SEM,  $n = 3$ . \*\* $P < 0.01$  versus mimic NC or anti-NC (Student's *t*-test).

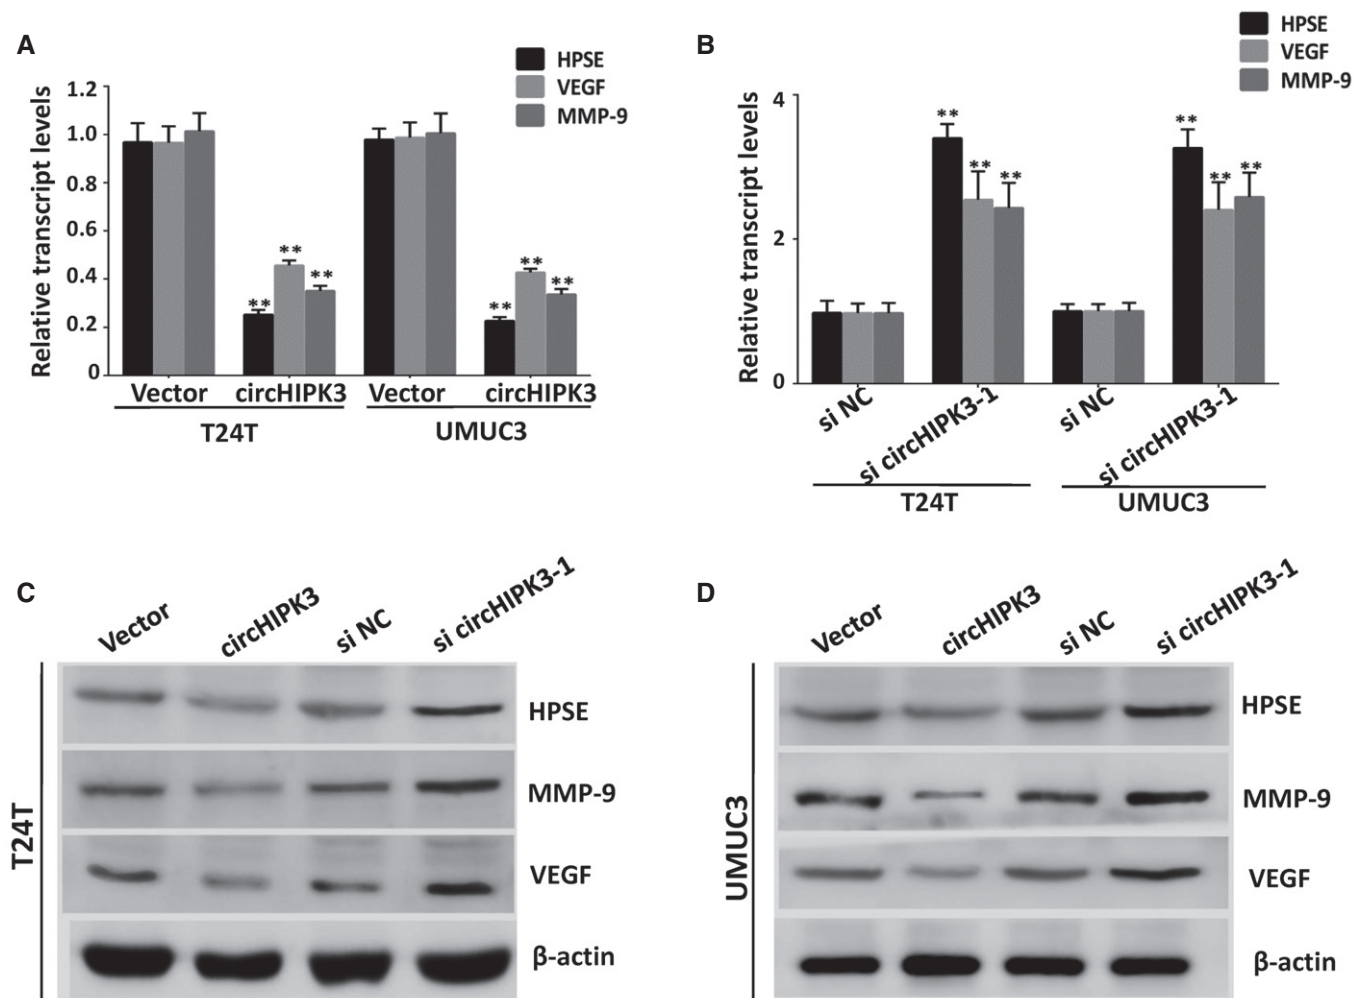

**Figure EV5. Over-expression of circHIPK3 down-regulates the expression of HPSE, MMP-9, and VEGF in bladder cancer cells.**

A–D Real-time PCR and Western blot assays demonstrated that over-expression of circHIPK3 in bladder cancer cells significantly down-regulates the expression of HPSE, together with its downstream targets MMP-9 and VEGF. In contrast, knockdown of circHIPK3 up-regulates the expression of HPSE, MMP-9, and VEGF. Data are mean ± SEM,  $n = 3$ . \*\* $P < 0.01$  versus vector (A) or si NC (B) (Student's  $t$ -test).
